# Supplementary material for: Influence of pH on the kinetics of hydrolysis reactions: the case of epichlorohydrin and glycidol
Source: Royal Society of Chemistry journal article supplement (doi:10.1039/d2re00191h), 2022-01-01
Supplement: d2re00191h1.pdf [file d2re00191h1.pdf]

Supporting Information for

# Influence of pH on the Kinetics of Hydrolysis Reactions: The Case of Epichlorohydrin and Glycidol

*Flavio Tollini<sup>a</sup>, Alice Occhetta<sup>a</sup>, Francesca Broglia<sup>a</sup>, Vincenzo Calemma<sup>b</sup>, Stefano Carminati<sup>b</sup>, Giuseppe Storti<sup>a</sup>, Mattia Sponchioni<sup>a,\*</sup>, and Davide Moscatelli<sup>a</sup>*

<sup>a</sup> Department of Chemistry, Materials, and Chemical Engineering “Giulio Natta”, Politecnico di Milano, Piazza Leonardo da Vinci 32, 20133 Milan, Italy.

<sup>b</sup> ENI SPA, Via Felice Maritano 26 – 20097 San Donato Milanese, Italy

\* Corresponding author: [mattia.sponchioni@polimi.it](mailto:mattia.sponchioni@polimi.it)

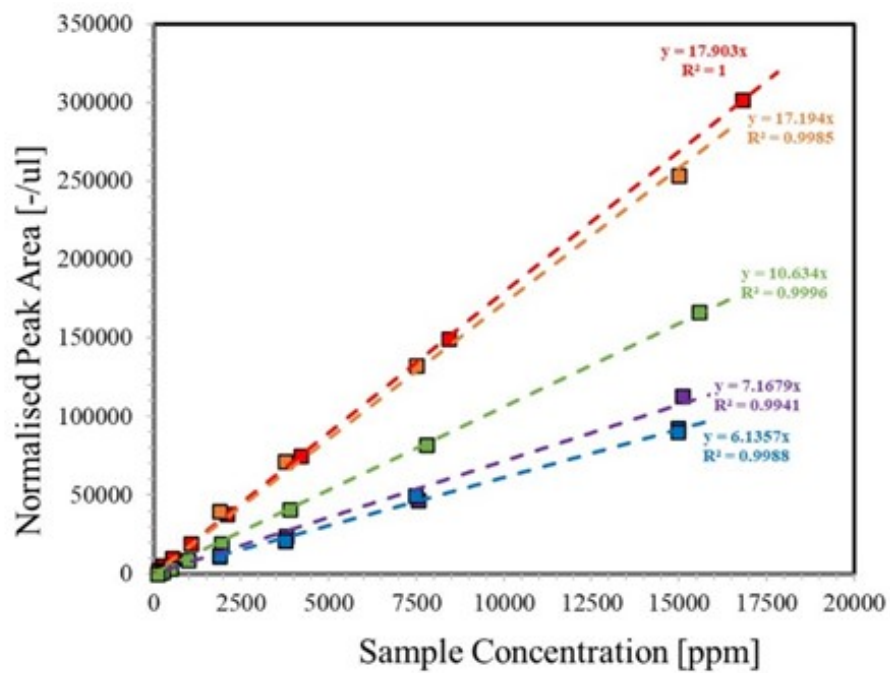

**Figure S1.** HPLC external calibration curve for:

■ GLY; ■ GL; ■ MCPD; ■ DCP; ■ EPI.

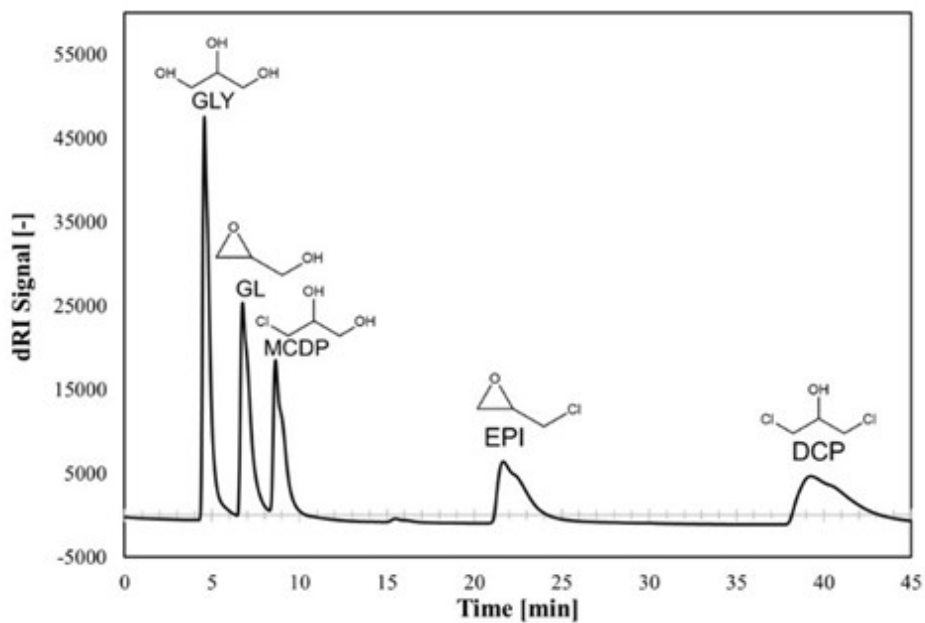

**Figure S2.** Example of HPLC elugram used to characterize the reaction mixture.

**Table S1.** Residence time and external calibration for the HPLC method.

| species | rt [min] | m      | r <sup>2</sup> |
|---------|----------|--------|----------------|
| GLY     | 4.54     | 17.903 | 0.9992         |
| GL      | 6.84     | 10.634 | 0.9996         |
| MCPD    | 8.767    | 17.194 | 0.9985         |
| EPI     | 15.94    | 6.1357 | 0.9988         |
| DCP     | 22.48    | 7.1679 | 0.9941         |

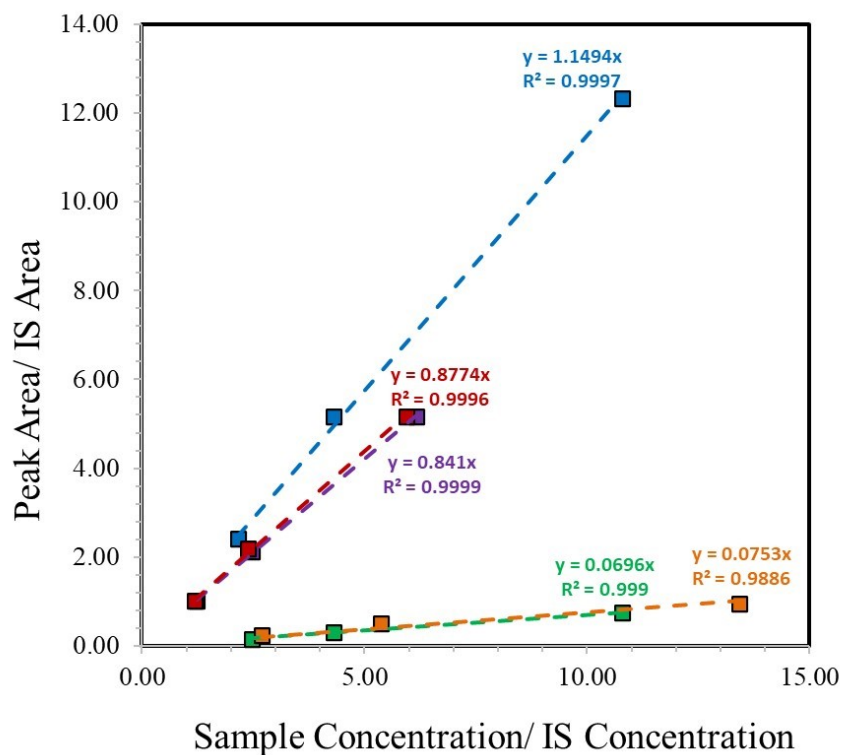

**Figure S3.** GC internal calibration curve. ■ GL; ■ MCPD; ■ 1,3-DCP; ■ 1,2-DCP; ■ EPI.

**Table S2.** Residence time and internal calibration for the GC method.

| species | rt [min] | m      | R <sup>2</sup> |
|---------|----------|--------|----------------|
| GL      | 5.24     | 0.0696 | 0.9999         |
| MCPD    | 9.35     | 0.0753 | 0.9886         |
| EPI     | 3.52     | 1.1494 | 0.9997         |
| 1,3-DCP | 6.58     | 0.8410 | 0.9999         |
| 1,2-DCP | 6.98     | 0.8774 | 0.9996         |

*Table S3. Experimental initial Conditions.*

| <b>Exp.</b> | <b>T</b><br>[°C] | <b>[EPI]<sup>0</sup></b><br>[mol L <sup>-1</sup> ] | <b>[Cl]<sup>0</sup></b><br>[mol L <sup>-1</sup> ] | <b>[MCPD]<sup>0</sup></b><br>[mol L <sup>-1</sup> ] | <b>[DCP]<sup>0</sup></b><br>[mol L <sup>-1</sup> ] | <b>[GL]<sup>0</sup></b><br>[mol L <sup>-1</sup> ] | <b>[GLY]<sup>0</sup></b><br>[mol L <sup>-1</sup> ] | <b>pH<sup>0</sup></b><br>[-] |
|-------------|------------------|----------------------------------------------------|---------------------------------------------------|-----------------------------------------------------|----------------------------------------------------|---------------------------------------------------|----------------------------------------------------|------------------------------|
| 1           | 20               | 0.0                                                | 0.63                                              | 0.00                                                | 0.0                                                | 0.13                                              | 0.0                                                | 1.00                         |
| 2           | 20               | 0.0                                                | 0.00                                              | 0.07                                                | 0.0                                                | 0.00                                              | 0.0                                                | 13.25                        |
| 3           | 20               | 0.0                                                | 0.10                                              | 0.00                                                | 0.0                                                | 0.13                                              | 0.0                                                | 1.00                         |
| 4           | 20               | 0.0                                                | 0.00                                              | 0.00                                                | 0.0                                                | 0.14                                              | 0.0                                                | 5.80                         |
| 5           | 20               | 0.0                                                | 1.14                                              | 0.00                                                | 0.0                                                | 0.14                                              | 0.0                                                | 6.50                         |
| 6           | 20               | 0.0                                                | 0.00                                              | 0.00                                                | 0.0                                                | 0.14                                              | 0.0                                                | 13.23                        |
| 7           | 30               | 0.0                                                | 0.63                                              | 0.00                                                | 0.0                                                | 0.13                                              | 0.0                                                | 0.93                         |
| 8           | 30               | 0.0                                                | 0.10                                              | 0.00                                                | 0.0                                                | 0.13                                              | 0.0                                                | 1.00                         |
| 9           | 30               | 0.0                                                | 0.00                                              | 0.00                                                | 0.0                                                | 0.14                                              | 0.0                                                | 13.00                        |
| 10          | 40               | 0.0                                                | 0.63                                              | 0.00                                                | 0.0                                                | 0.13                                              | 0.0                                                | 1.00                         |
| 11          | 40               | 0.0                                                | 0.00                                              | 0.09                                                | 0.0                                                | 0.00                                              | 0.0                                                | 12.70                        |
| 12          | 40               | 0.0                                                | 0.10                                              | 0.00                                                | 0.0                                                | 0.13                                              | 0.0                                                | 0.97                         |
| 13          | 40               | 0.0                                                | 0.00                                              | 0.00                                                | 0.0                                                | 0.14                                              | 0.0                                                | 6.00                         |
| 14          | 40               | 0.0                                                | 1.14                                              | 0.00                                                | 0.0                                                | 0.14                                              | 0.0                                                | 5.70                         |
| 15          | 40               | 0.0                                                | 0.00                                              | 0.00                                                | 0.0                                                | 0.14                                              | 0.0                                                | 12.60                        |
| 16          | 50               | 0.0                                                | 0.00                                              | 0.00                                                | 0.0                                                | 0.15                                              | 0.0                                                | 6.30                         |
| 17          | 50               | 0.0                                                | 0.57                                              | 0.00                                                | 0.0                                                | 0.14                                              | 0.0                                                | 5.80                         |
| 18          | 50               | 0.0                                                | 0.00                                              | 0.00                                                | 0.0                                                | 0.14                                              | 0.0                                                | 12.34                        |
| 19          | 60               | 0.0                                                | 0.63                                              | 0.00                                                | 0.0                                                | 0.13                                              | 0.0                                                | 1.00                         |
| 20          | 60               | 0.0                                                | 0.00                                              | 0.09                                                | 0.0                                                | 0.00                                              | 0.0                                                | 12.20                        |
| 21          | 60               | 0.0                                                | 0.10                                              | 0.00                                                | 0.0                                                | 0.13                                              | 0.0                                                | 1.00                         |
| 22          | 60               | 0.0                                                | 0.00                                              | 0.00                                                | 0.0                                                | 0.14                                              | 0.0                                                | 6.80                         |
| 23          | 60               | 0.0                                                | 0.57                                              | 0.00                                                | 0.0                                                | 0.14                                              | 0.0                                                | 5.60                         |
| 24          | 60               | 0.0                                                | 0.00                                              | 0.00                                                | 0.0                                                | 0.14                                              | 0.0                                                | 12.1                         |

*Table S3. Experimental initial Conditions.*

| <b>Exp.</b> | <b>T</b><br><b>[°C]</b> | <b>[EPI]<sup>0</sup></b><br><b>[mol L<sup>-1</sup>]</b> | <b>[Cl]<sup>0</sup></b><br><b>[mol L<sup>-1</sup>]</b> | <b>[MCPD]<sup>0</sup></b><br><b>[mol L<sup>-1</sup>]</b> | <b>[DCP]<sup>0</sup></b><br><b>[mol L<sup>-1</sup>]</b> | <b>[GL]<sup>0</sup></b><br><b>[mol L<sup>-1</sup>]</b> | <b>[GLY]<sup>0</sup></b><br><b>[mol L<sup>-1</sup>]</b> | <b>pH<sup>0</sup></b><br><b>[-]</b> |
|-------------|-------------------------|---------------------------------------------------------|--------------------------------------------------------|----------------------------------------------------------|---------------------------------------------------------|--------------------------------------------------------|---------------------------------------------------------|-------------------------------------|
| 25          | 20                      | 0.10                                                    | 1.16                                                   | 0.00                                                     | 0.00                                                    | 0.00                                                   | 0.00                                                    | 1.00                                |
| 26          | 20                      | 0.00                                                    | 0.00                                                   | 0.00                                                     | 0.10                                                    | 0.00                                                   | 0.00                                                    | 13.40                               |
| 27          | 20                      | 0.11                                                    | 0.10                                                   | 0.00                                                     | 0.00                                                    | 0.00                                                   | 0.00                                                    | 0.96                                |
| 28          | 20                      | 0.11                                                    | 0.00                                                   | 0.00                                                     | 0.00                                                    | 0.00                                                   | 0.00                                                    | 5.20                                |
| 29          | 20                      | 0.11                                                    | 1.14                                                   | 0.00                                                     | 0.00                                                    | 0.00                                                   | 0.00                                                    | 5.70                                |
| 30          | 20                      | 0.05                                                    | 0.00                                                   | 0.00                                                     | 0.00                                                    | 0.00                                                   | 0.00                                                    | 13.00                               |
| 31          | 30                      | 0.10                                                    | 0.10                                                   | 0.00                                                     | 0.00                                                    | 0.00                                                   | 0.00                                                    | 1.00                                |
| 32          | 30                      | 0.11                                                    | 0.00                                                   | 0.00                                                     | 0.00                                                    | 0.00                                                   | 0.00                                                    | 13.00                               |
| 33          | 40                      | 0.10                                                    | 0.63                                                   | 0.00                                                     | 0.00                                                    | 0.00                                                   | 0.00                                                    | 0.90                                |
| 34          | 40                      | 0.00                                                    | 0.00                                                   | 0.00                                                     | 0.10                                                    | 0.00                                                   | 0.00                                                    | 12.80                               |
| 35          | 40                      | 0.10                                                    | 0.10                                                   | 0.00                                                     | 0.00                                                    | 0.00                                                   | 0.00                                                    | 1.10                                |
| 36          | 40                      | 0.11                                                    | 0.00                                                   | 0.00                                                     | 0.00                                                    | 0.00                                                   | 0.00                                                    | 6.90                                |
| 37          | 40                      | 0.11                                                    | 1.14                                                   | 0.00                                                     | 0.00                                                    | 0.00                                                   | 0.00                                                    | 5.60                                |
| 38          | 40                      | 0.11                                                    | 0.00                                                   | 0.00                                                     | 0.00                                                    | 0.00                                                   | 0.00                                                    | 12.80                               |
| 39          | 50                      | 0.10                                                    | 0.63                                                   | 0.00                                                     | 0.00                                                    | 0.00                                                   | 0.00                                                    | 1.00                                |
| 40          | 50                      | 0.11                                                    | 0.00                                                   | 0.00                                                     | 0.00                                                    | 0.00                                                   | 0.00                                                    | 6.90                                |
| 41          | 50                      | 0.10                                                    | 0.57                                                   | 0.00                                                     | 0.00                                                    | 0.00                                                   | 0.00                                                    | 6.20                                |
| 42          | 50                      | 0.11                                                    | 0.00                                                   | 0.00                                                     | 0.00                                                    | 0.00                                                   | 0.00                                                    | 12.40                               |
| 43          | 60                      | 0.10                                                    | 1.16                                                   | 0.00                                                     | 0.00                                                    | 0.00                                                   | 0.00                                                    | 1.00                                |
| 44          | 60                      | 0.00                                                    | 0.00                                                   | 0.00                                                     | 0.08                                                    | 0.00                                                   | 0.00                                                    | 12.10                               |
| 45          | 60                      | 0.11                                                    | 0.10                                                   | 0.00                                                     | 0.00                                                    | 0.00                                                   | 0.00                                                    | 1.00                                |
| 46          | 60                      | 0.11                                                    | 0.00                                                   | 0.00                                                     | 0.00                                                    | 0.00                                                   | 0.00                                                    | 6.80                                |
| 47          | 60                      | 0.11                                                    | 1.14                                                   | 0.00                                                     | 0.00                                                    | 0.00                                                   | 0.00                                                    | 6.80                                |
| 48          | 60                      | 0.11                                                    | 0.00                                                   | 0.00                                                     | 0.00                                                    | 0.00                                                   | 0.00                                                    | 11.90                               |

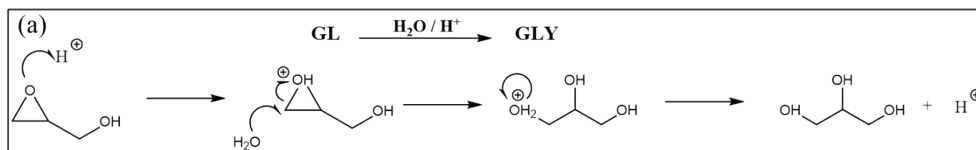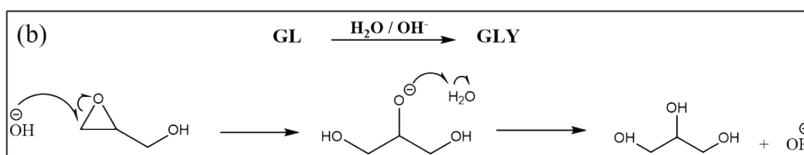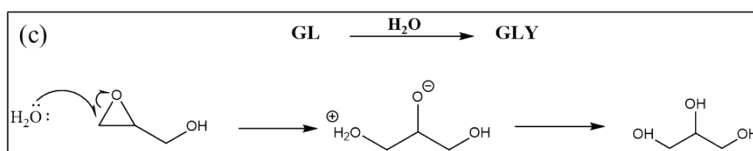

**Figure S4** – Reaction mechanism of GL hydrolysis. (a) Acid conditions. (b) Alkaline conditions. (c) Neutral conditions.

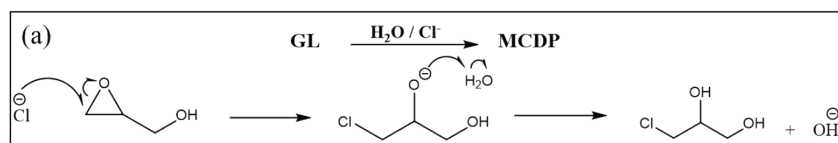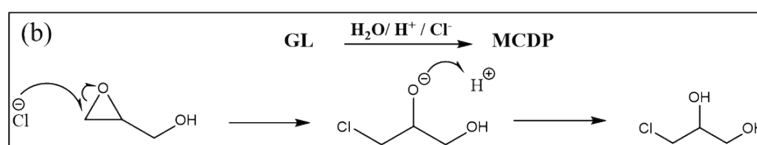

**Figure S5** – Reaction mechanism of GL chlorination. (a) Neutral conditions. (b) Acid conditions.

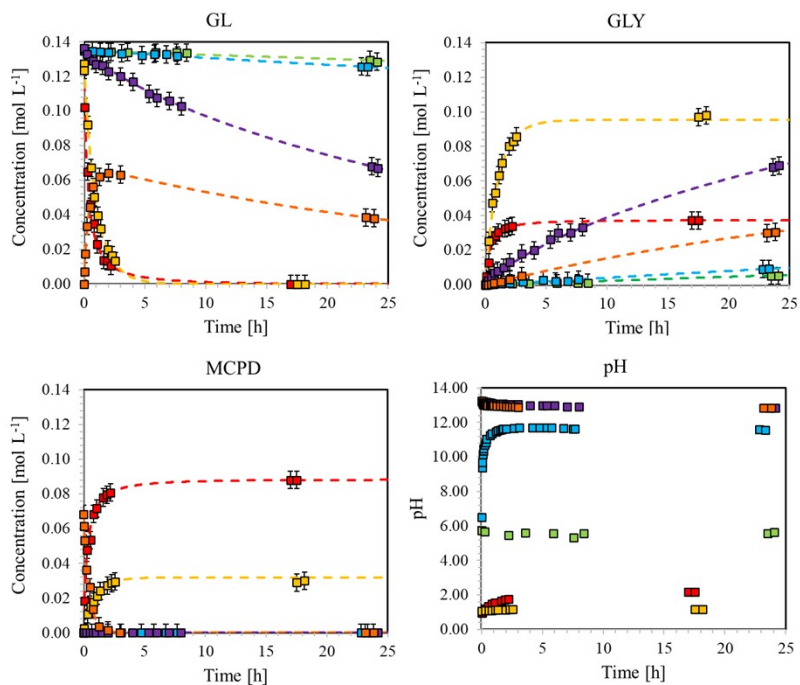

**Figure S6** - GL reactivity at  $T = 20^{\circ}\text{C}$ . Dotted line: model prediction. Square: Experimental data. (Red): exp.1, (Orange): exp.2, (Yellow): exp.3, (Green): exp.4, (Light-Blue): exp.5, (Purple): exp.6.

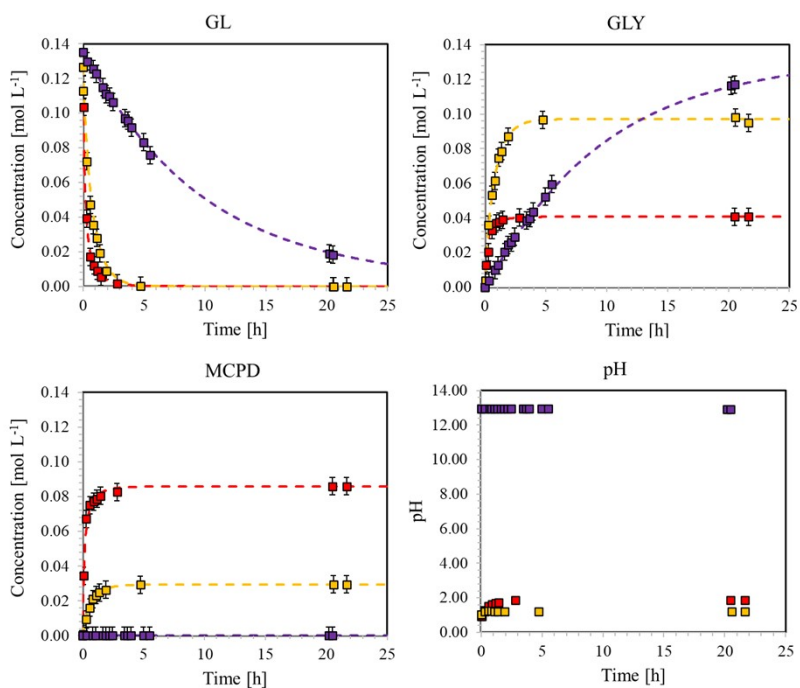

**Figure S7** - GL reactivity at  $T = 30^{\circ}\text{C}$ . Dotted line: model prediction. Square: Experimental data. (Red): exp.7, (Yellow): exp.8, (Purple): exp.9.

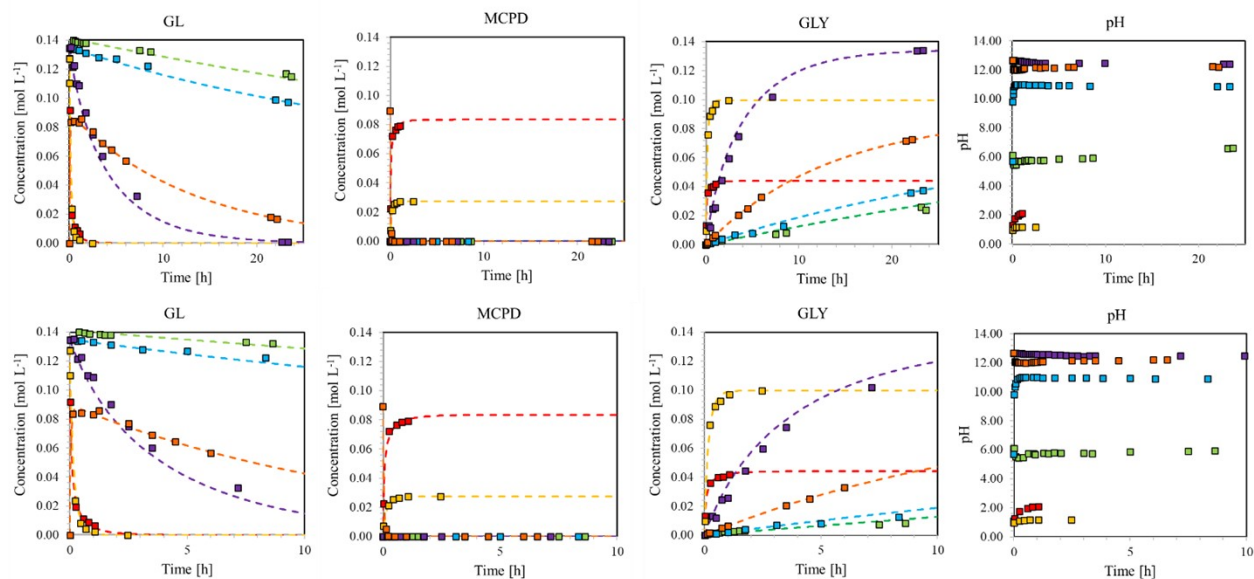

**Figure S8** – Top row: Time evolution of the concentrations of GL, GLY and MCPD as well as of pH during hydrolysis of GL and dehydrohalogenation of MCPD at  $T = 40\text{ }^{\circ}\text{C}$ . Dotted curves: model predictions. Symbols: Experimental data. (Red): exp.10, (Orange): exp.11, (Yellow): exp.12, (Green): exp.13, (Light-Blue): exp.14, (Purple): exp.15. Experimental conditions as in Table S3. Bottom row: Magnification of the first 10 h of the process for the same experiments.

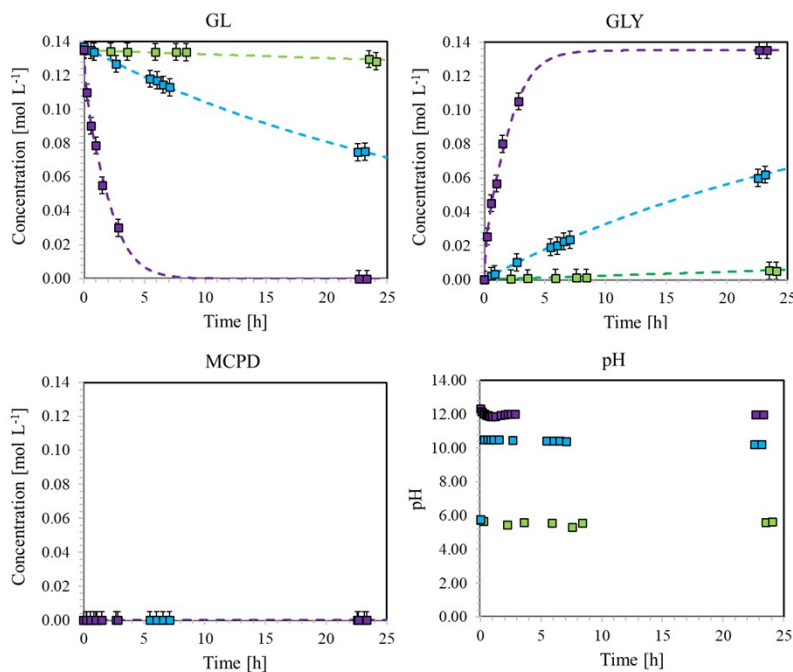

**Figure S9** - GL reactivity at  $T = 50\text{ }^{\circ}\text{C}$ . Dotted line: model prediction. Square: Experimental data. (Green): exp.16, (Light-Blue): exp. 17, (Purple): exp.18.



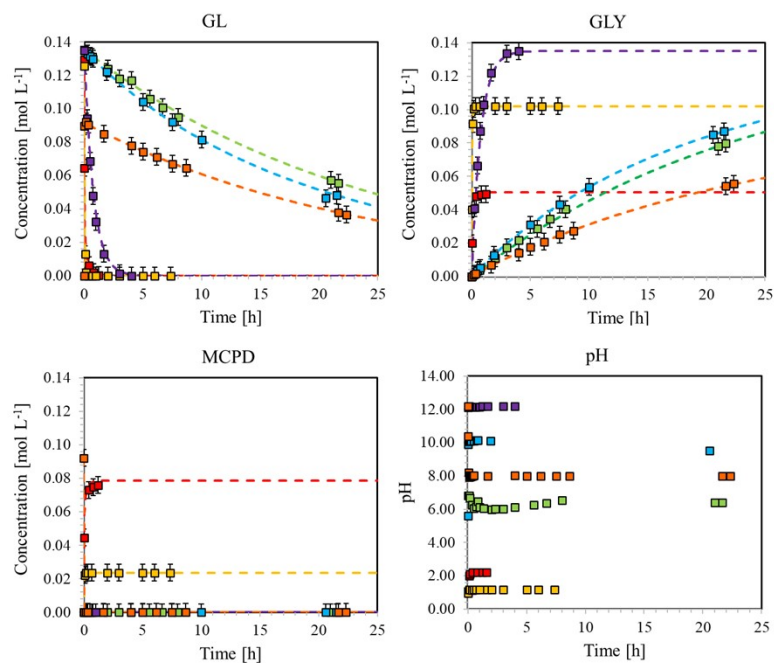

**Figure S10** - GL reactivity at  $T = 60^\circ\text{C}$ . Dotted line: model prediction. Square: Experimental data. (Red): exp.19, (Orange): exp.20, (Yellow): exp.21, (Green): exp.22, (Light-Blue): exp. 23, (Purple): exp.24.

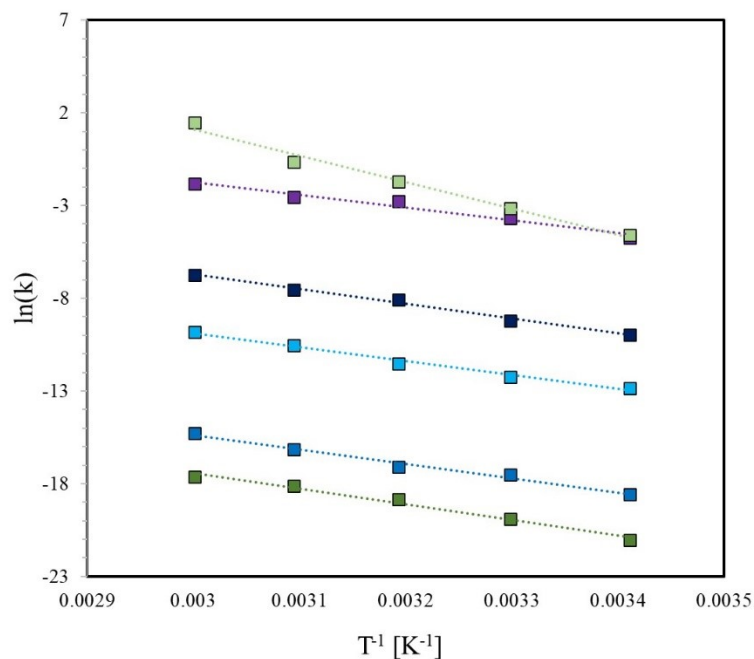

**Figure S11** - Arrhenius plot of the rate constants in Table 1. (■)  $k_{h,GL}^{acid}$ . (■)  $k_{h,GL}^{neutral}$ . (■)  $k_{h,GL}^{alkaline}$ .  
(■)  $k_{Cl,GL}^{acid}$ . (■)  $k_{Cl,GL}^{neutral}$ . (■)  $k_{hd,MCPD}^{alkaline}$ .

**Table S4** – Kinetic scheme and reaction rates reported in the literature for the EPI hydrolysis.

| Kinetic Scheme                             | Reaction rates                                                                                                                                                                     | Reference |
|--------------------------------------------|------------------------------------------------------------------------------------------------------------------------------------------------------------------------------------|-----------|
| $EPI + NaOH + H_2O \rightarrow GLY + NaCl$ | $R = A \exp(-E_a/RT) [EPI][OH^-]$<br>$A = 9.43 \times 10^8 [L \text{ mol}^{-1} \text{ s}^{-1}]$ ;<br>$E_a = 70790 [J \text{ mol}^{-1}]$ ;<br>$[OH^-] = 0.2 \text{ mol L}^{-1}$     | 33        |
| $EPI + H_2O \rightarrow MCPD$              | $R = A \exp(-E_a/RT) [EPI]$<br>$A = 4.92 \times 10^8 [s^{-1}]$ ;<br>$E_a = 78877 [J \text{ mol}^{-1}]$ ;<br><p style="text-align: center;">pH = 12</p>                             | 34        |
| $EPI + OH^- + H_2O \rightarrow GLY + Cl^-$ | $R = A \exp(-E_a/RT) [EPI] [OH^-]$<br>$A = 3.42 \times 10^{11} [L \text{ mol}^{-1} \text{ s}^{-1}]$ ;<br>$E_a = 87305 [J \text{ mol}^{-1}]$ ;<br>$[OH^-] = 0.2 \text{ mol L}^{-1}$ | 35        |

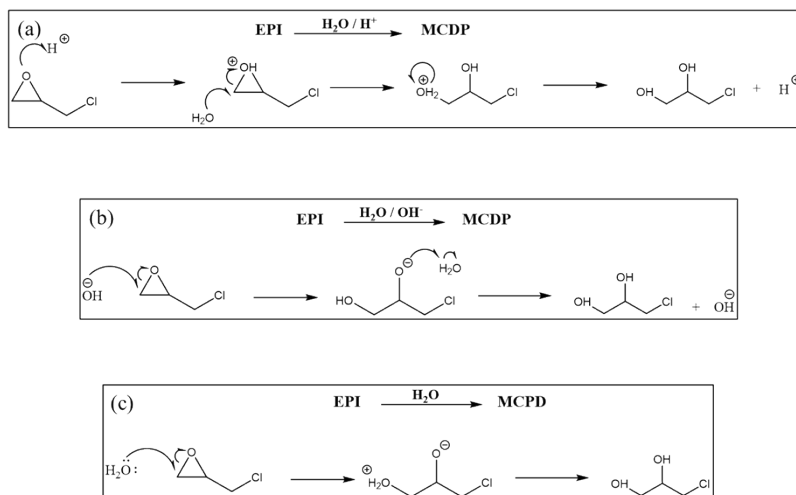

**Figure S12** - Reaction mechanism of EPI hydrolysis. (a) Acid conditions. (b) Alkaline conditions. (c) Neutral conditions.

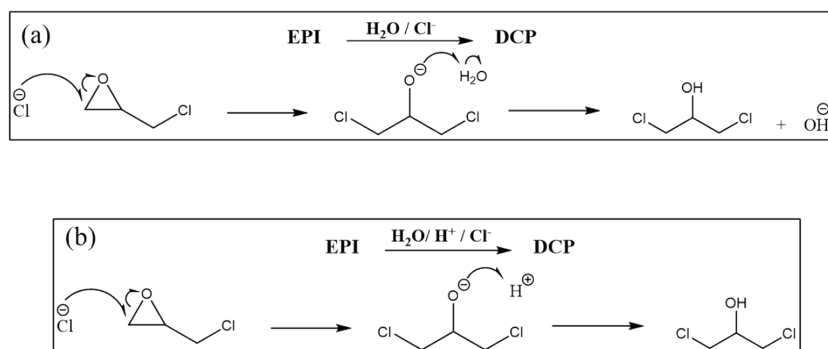

**Figure S13** - Reaction mechanism of EPI chlorination. (a) Neutral conditions. (b) Acid conditions.

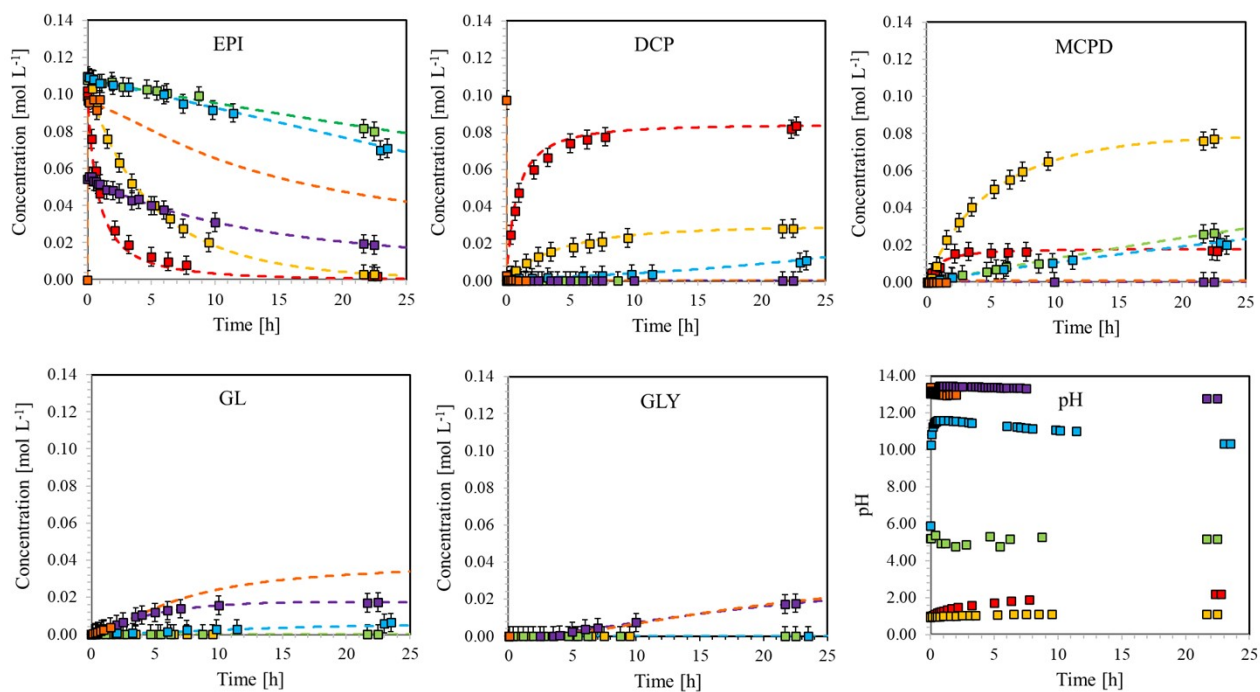

**Figure S14** – EPI reactivity at  $T = 20^{\circ}\text{C}$ . Dotted line: model prediction. Square: Experimental data. (Red): exp.25, (Orange): exp.26, (Yellow): exp.27, (Green): exp.28, (Light-Blue): exp.29, (Purple): exp.30.

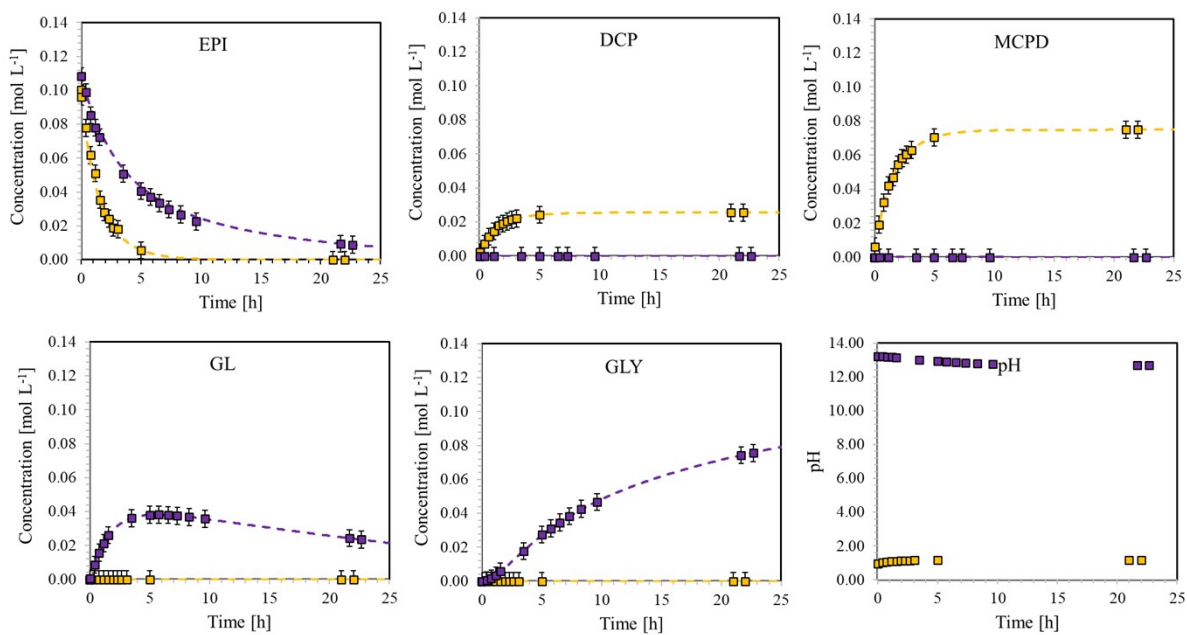

**Figure S15** - EPI reactivity at  $T = 30^{\circ}\text{C}$ . Dotted line: model prediction. Square: Experimental data. (Yellow): exp.31, (Purple): exp.32.

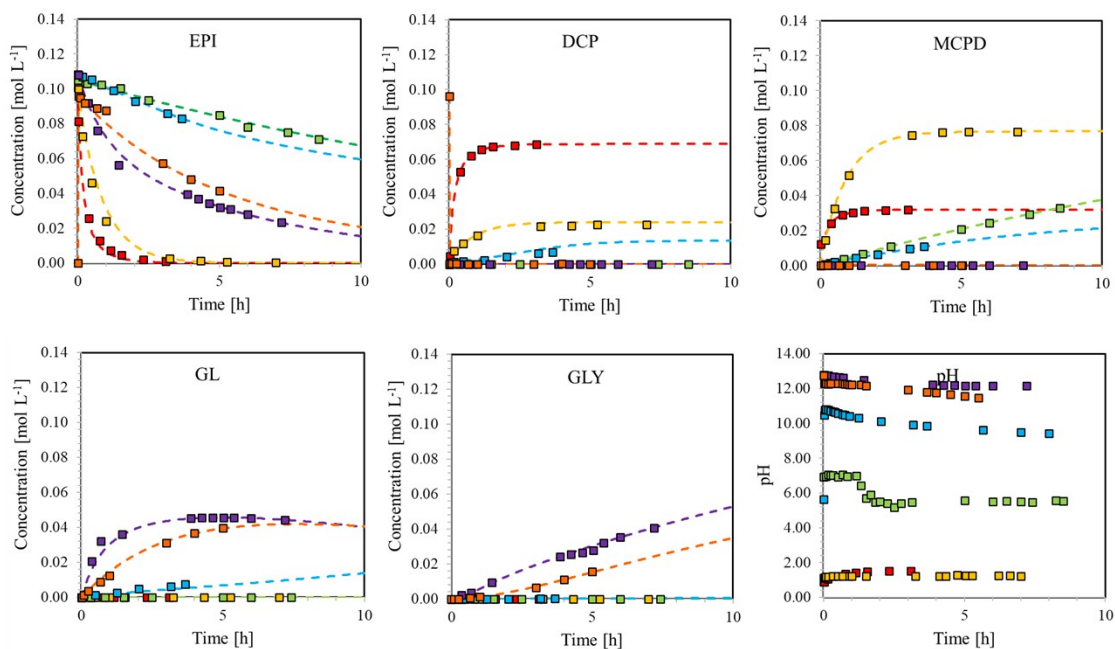

**Figure S16**– Concentration of the different species involved in the hydrolysis of EPI and pH values vs. time for the reaction run at  $T = 40\text{ }^{\circ}\text{C}$ . Dotted curves: model predictions. Squares: Experimental data. (Red): exp.33, (Orange): exp.34, (Yellow): exp.35, (Green): exp.36, (Light-Blue): exp.37, (Purple): exp.38. Experimental conditions as in Table S3.

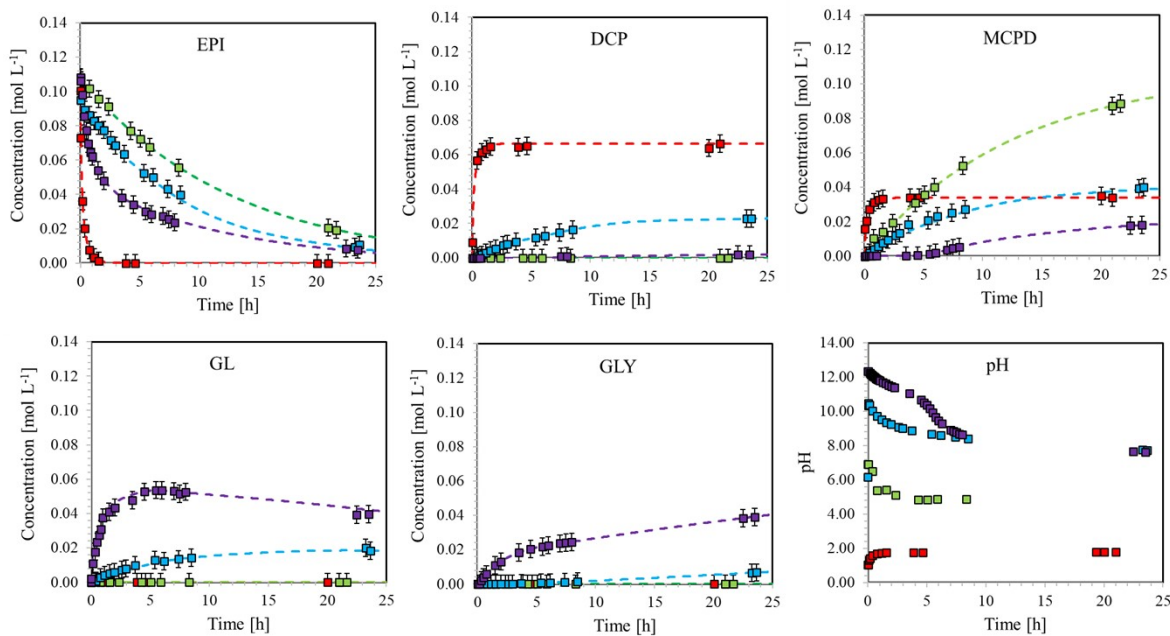

**Figure S17** - EPI reactivity at  $T = 50^{\circ}\text{C}$ . Dotted line: model prediction. Square: Experimental data. (Red): exp.39, (Green): exp.40, (Light-Blue): exp.41, (Purple): exp.42.

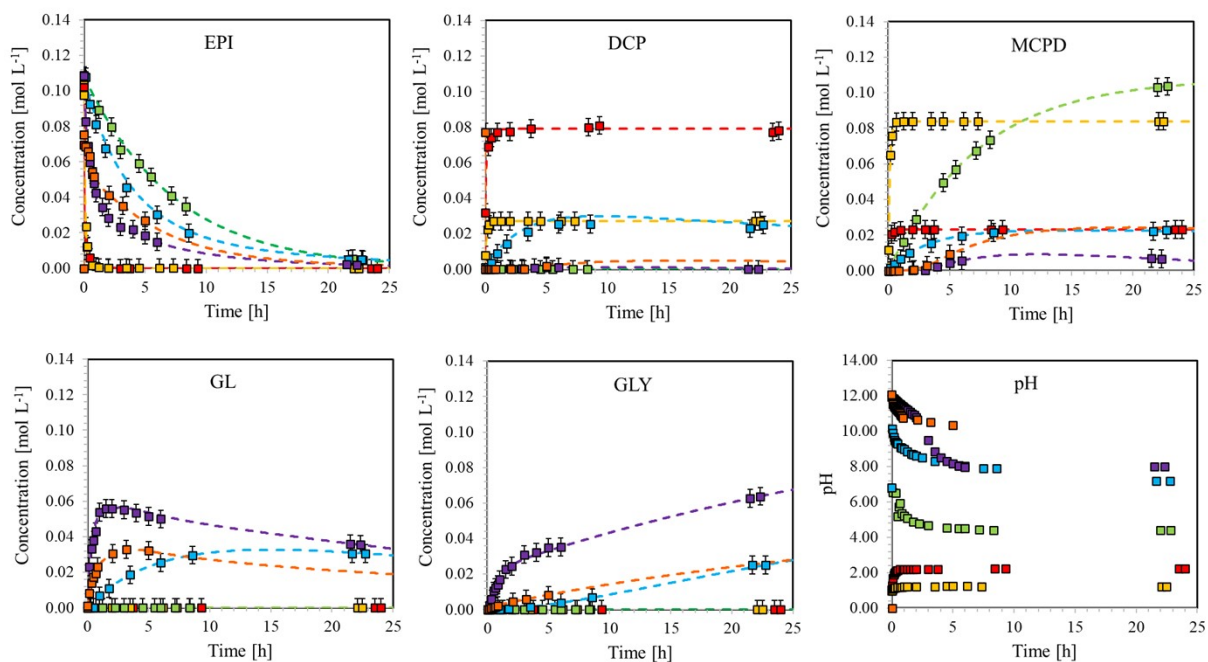

**Figure S18**– EPI reactivity at  $T = 60^\circ\text{C}$ . Dotted line: model prediction. Square: Experimental data. (Red): exp.43, (Orange): exp.44, (Yellow): exp.45, (Green): exp.46, (Light-Blue): exp.47, (Purple): exp.48.

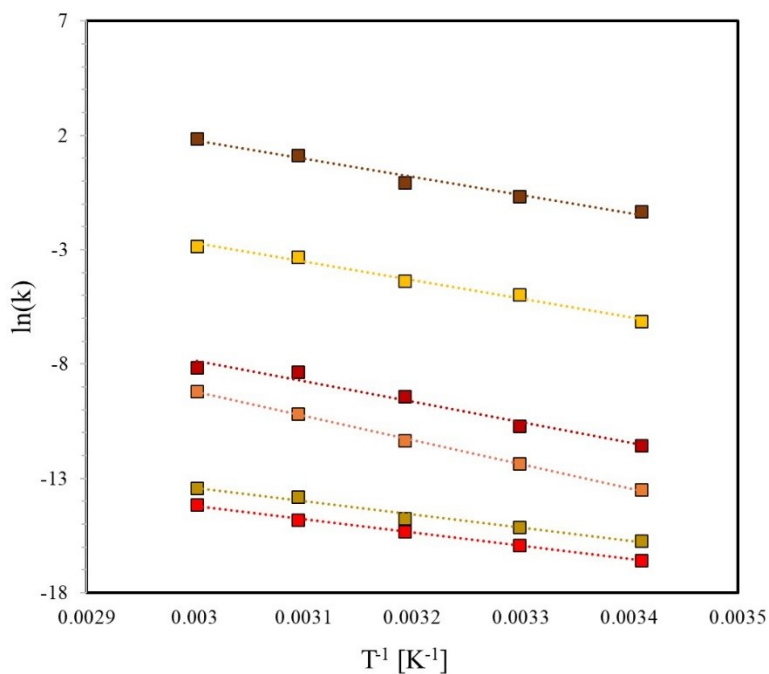

**Figure S19** - Arrhenius plot for the reactions involving EPI. (■)  $k_{h,EPI}^{acid}$ . (■)  $k_{h,EPI}^{neutral}$ . (■)  $k_{h,EPI}^{alkaline}$ . (■)  $k_{Cl,EPI}^{acid}$ . (■)  $k_{Cl,EPI}^{neutral}$ . (■)  $k_{hd,DCP}^{alkaline}$ .

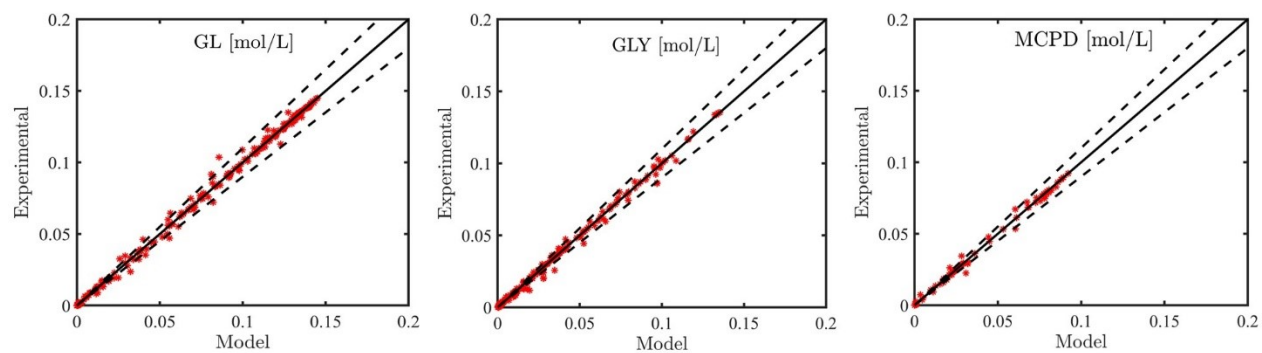

**Figure S20- Parity plot GL reactivity.**

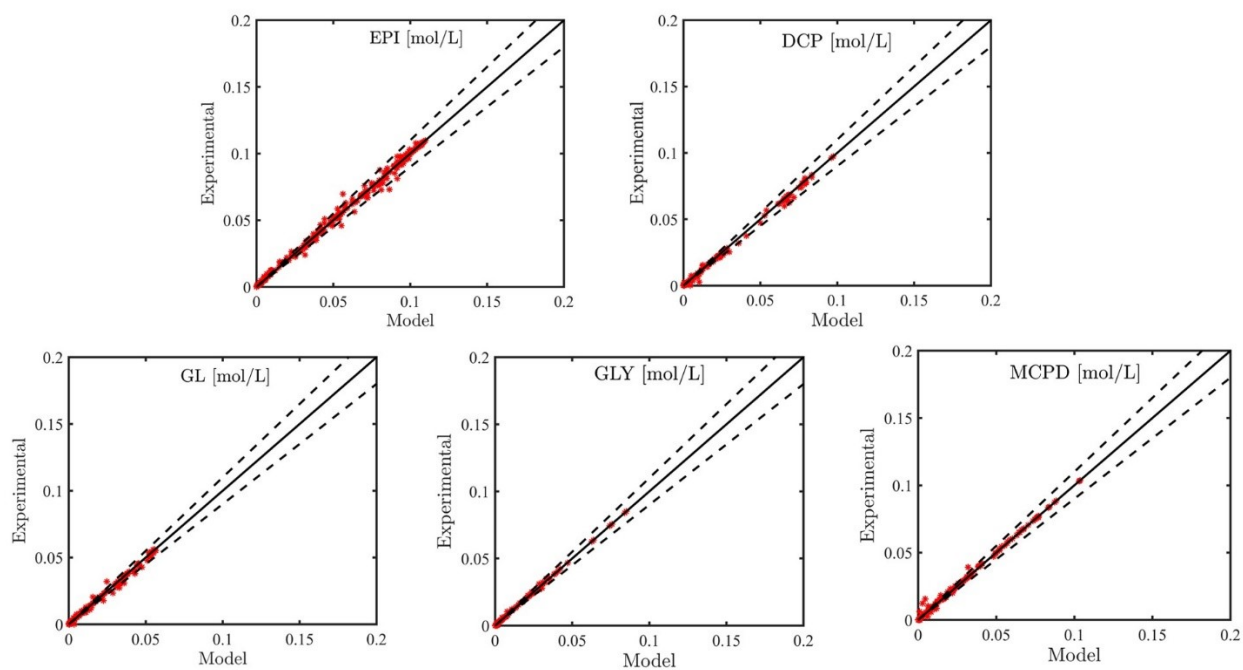

**Figure S21- Parity plot EPI reactivity.**



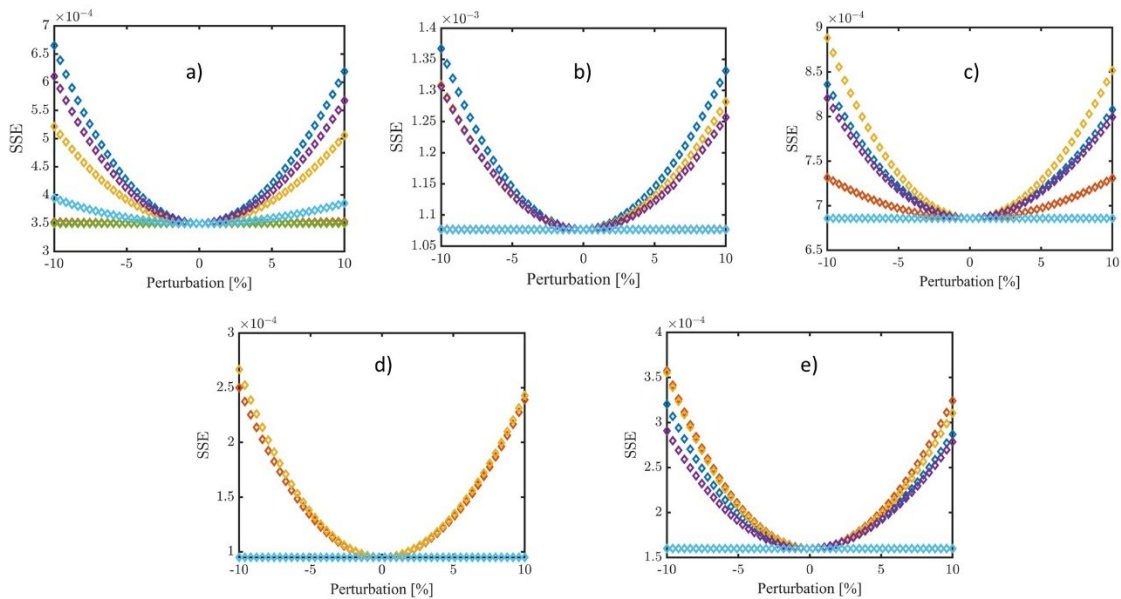

**Figure S22 - Sensitivity analysis.** a) 20°C, b) 30°C, c) 40°C, d) 50°C, e) 60°C.

$\diamond k_{h, GL}^{acid}$ ,  $\diamond k_{h, GL}^{neutral}$ ,  $\diamond k_{h, GL}^{alkaline}$ ,  $\diamond k_{Cl, GL}^{acid}$ ,  $\diamond k_{Cl, GL}^{neutral}$ ,  $\diamond k_{hd, MCPD}^{alkaline}$

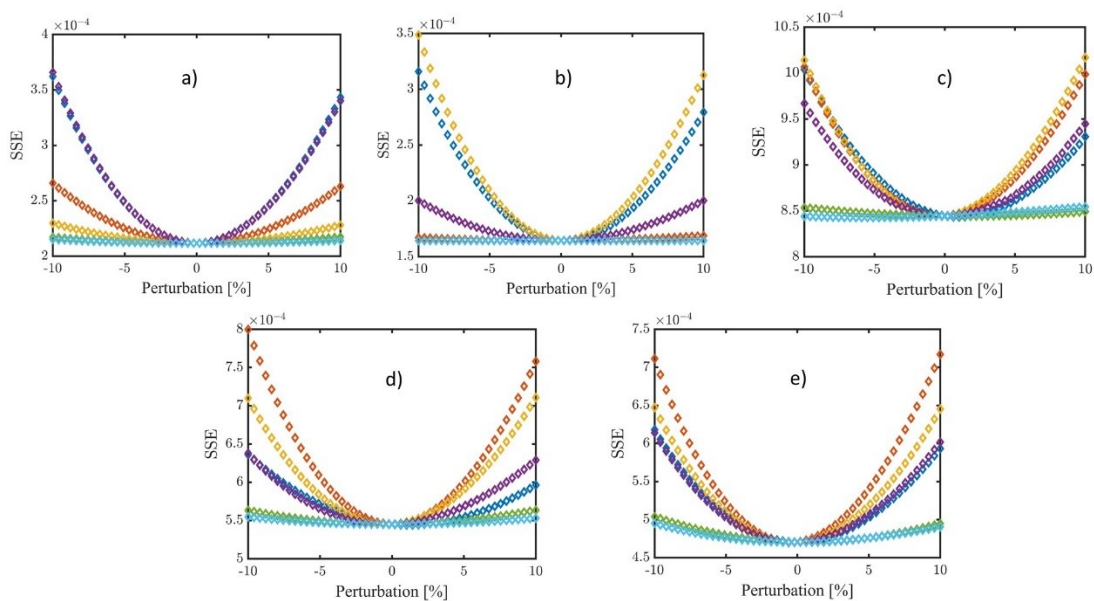

**Figure S23 - Sensitivity analysis.** a) 20°C, b) 30°C, c) 40°C, d) 50°C, e) 60°C.

$\diamond k_{h, EPI}^{acid}$ ,  $\diamond k_{h, EPI}^{neutral}$ ,  $\diamond k_{h, EPI}^{alkaline}$ ,  $\diamond k_{Cl, EPI}^{acid}$ ,  $\diamond k_{Cl, EPI}^{neutral}$ ,  $\diamond k_{hd, DCP}^{alkaline}$
